# Supplementary material for: Metagenomic Analyses of Plant Growth-Promoting and Carbon-Cycling Genes in Maize Rhizosphere Soils with Distinct Land-Use and Management Histories
Source: MDPI journal article supplement (doi:10.3390/genes12091431), 2021-09-17
Supplement: s1 [file s1]

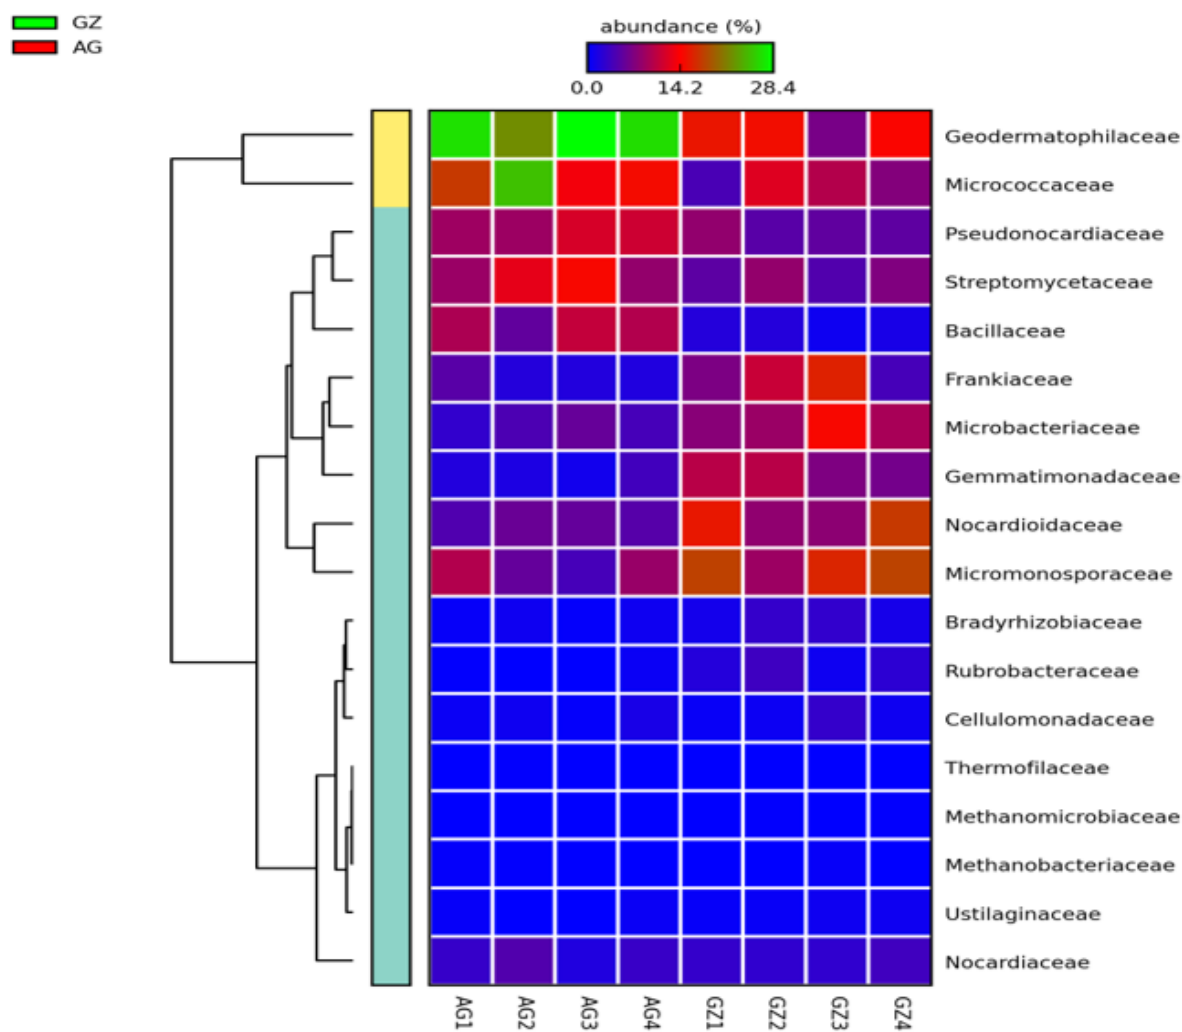

**Figure S1:** Relative abundance of major microbial families found in the maize rhizospheric soils

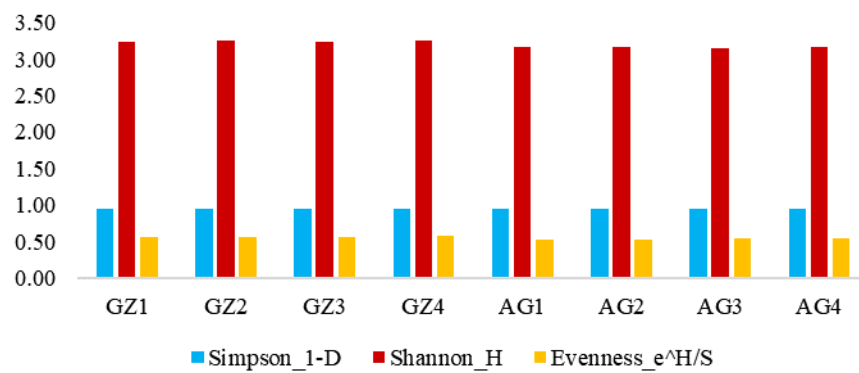

**Figure S2:** Alpha diversity of genes involved in plant growth promotion in maize rhizospheric samples

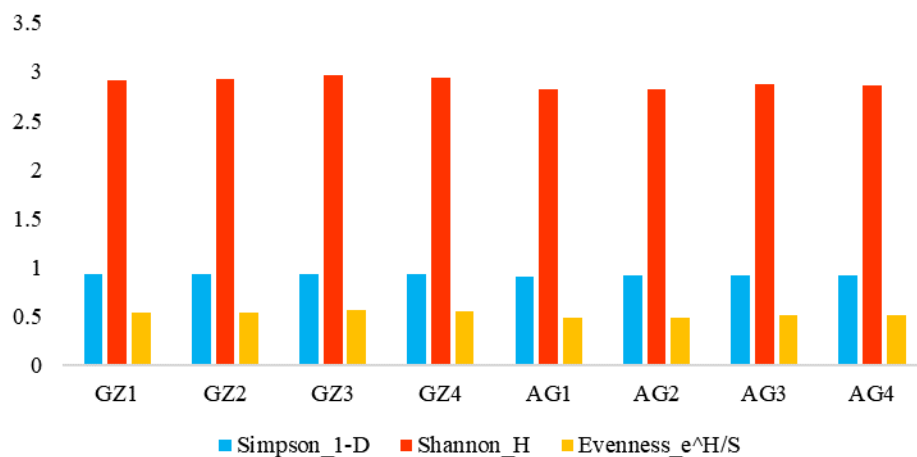

**Figure S3:** Alpha diversity of genes involved in carbon cycling in maize rhizospheric samples

**Table S1:** Physicochemical parameters of soil samples

| Sample | Parameter | pH<br>(H <sub>2</sub> O) | S<br>(mg/kg) | Total C<br>(%) | P<br>(mg/kg) | K<br>(mg/kg) | N-NO <sub>3</sub><br>(mg/kg) | N-NH <sub>4</sub><br>(mg/kg) | Organic<br>C (%) | Organic<br>matter (%) |
|--------|-----------|--------------------------|--------------|----------------|--------------|--------------|------------------------------|------------------------------|------------------|-----------------------|
| GZ1    |           | 6.79                     | 16.2         | 1.24           | 24.29        | 338          | 16.56                        | 3.22                         | 1.04             | 4.02                  |
| GZ2    |           | 7.04                     | 0.00         | 1.19           | 19.75        | 430          | 16.42                        | 3.32                         | 1.07             | 4.16                  |
| GZ3    |           | 6.64                     | 2.78         | 1.18           | 40.39        | 338          | 18.02                        | 3.68                         | 1.06             | 4.19                  |
| GZ4    |           | 6.45                     | 0.00         | 1.04           | 26.52        | 254          | 14.16                        | 1.87                         | 0.81             | 3.46                  |
| AG1    |           | 5.49                     | 0.00         | 0.49           | 29.31        | 121          | 0.97                         | 8.01                         | 0.26             | 1.38                  |
| AG2    |           | 4.84                     | 0.68         | 0.40           | 56.88        | 110          | 1.91                         | 10.6                         | 0.26             | 1.54                  |
| AG3    |           | 5.04                     | 0.00         | 0.48           | 22.75        | 86.1         | 1.00                         | 5.34                         | 0.24             | 1.46                  |
| AG4    |           | 5.44                     | 0.00         | 0.49           | 16.25        | 116          | 0.93                         | 6.73                         | 0.29             | 1.64                  |

**Table S2:** Data of plant growth-promoting genes found in maize rhizospheric samples

| Functional gene involved in             | Gene code   | GZ1  | GZ2  | GZ3  | GZ4  | AG1  | AG2  | AG3 | AG4 |
|-----------------------------------------|-------------|------|------|------|------|------|------|-----|-----|
| 2,3-butanediol and acetoin biosynthesis | <i>budB</i> | 411  | 496  | 508  | 358  | 805  | 600  | 227 | 285 |
|                                         | <i>budA</i> | 407  | 452  | 545  | 324  | 776  | 488  | 220 | 262 |
|                                         | <i>alS</i>  | 1661 | 1662 | 2255 | 1420 | 2529 | 1712 | 789 | 878 |
|                                         | <i>budC</i> | 1    | 5    | 6    | 0    | 3    | 5    | 0   | 3   |
| 4-hydroxybenzoate biosynthesis          | <i>ubiC</i> | 5    | 6    | 9    | 3    | 8    | 8    | 3   | 5   |
| ACC deaminase activity                  | <i>acdS</i> | 203  | 229  | 284  | 187  | 190  | 171  | 99  | 81  |
|                                         | <i>dcyD</i> | 18   | 21   | 17   | 12   | 12   | 13   | 3   | 6   |
| Ammonification                          | <i>ureC</i> | 538  | 477  | 735  | 821  | 1023 | 607  | 516 | 792 |
| Arsenate degradation                    | <i>gabT</i> | 15   | 17   | 16   | 11   | 18   | 9    | 10  | 3   |
|                                         | <i>arsC</i> | 505  | 555  | 618  | 402  | 543  | 365  | 226 | 211 |
| Denitrification                         | <i>nirK</i> | 25   | 29   | 50   | 47   | 37   | 14   | 7   | 21  |
|                                         | <i>nirS</i> | 1590 | 1684 | 2374 | 1416 | 2138 | 1456 | 786 | 771 |
|                                         | <i>norB</i> | 20   | 15   | 20   | 15   | 8    | 7    | 5   | 0   |
| Sulfur metabolism                       | <i>cysC</i> | 954  | 1137 | 1329 | 1222 | 808  | 772  | 441 | 445 |
|                                         | <i>cysI</i> | 419  | 515  | 783  | 385  | 410  | 277  | 157 | 160 |
|                                         | <i>cysJ</i> | 137  | 145  | 206  | 103  | 143  | 117  | 41  | 53  |
|                                         | <i>cysH</i> | 355  | 367  | 465  | 304  | 449  | 383  | 172 | 211 |
|                                         | <i>cysD</i> | 938  | 962  | 1275 | 770  | 1408 | 912  | 465 | 480 |
|                                         | <i>cysN</i> | 814  | 743  | 1086 | 728  | 1429 | 955  | 499 | 482 |
| IAA biosynthesis                        | <i>ipdC</i> | 13   | 13   | 11   | 8    | 18   | 9    | 6   | 3   |
| Nitrification                           | <i>amoA</i> | 28   | 52   | 36   | 36   | 29   | 12   | 11  | 13  |
| Nitrogen fixation                       | <i>nifH</i> | 2    | 1    | 1    | 0    | 2    | 0    | 0   | 0   |
|                                         | <i>nifA</i> | 366  | 540  | 481  | 222  | 179  | 94   | 36  | 77  |
|                                         | <i>fixJ</i> | 91   | 80   | 154  | 85   | 57   | 41   | 13  | 15  |
| Oxidative stress                        | <i>sodB</i> | 279  | 372  | 440  | 260  | 250  | 121  | 87  | 77  |
|                                         | <i>GST</i>  | 938  | 1205 | 1686 | 1001 | 888  | 543  | 280 | 331 |
|                                         | <i>cat</i>  | 1385 | 1523 | 2294 | 1215 | 2309 | 1598 | 805 | 813 |
| Phenazine                               | <i>phzF</i> | 523  | 495  | 646  | 384  | 661  | 463  | 243 | 265 |
| Phosphorus cycling                      | <i>gdh</i>  | 759  | 898  | 1020 | 540  | 718  | 421  | 189 | 233 |
|                                         | <i>ppX</i>  | 752  | 824  | 1197 | 739  | 1105 | 762  | 420 | 410 |
|                                         | <i>ppK</i>  | 2036 | 2256 | 2646 | 1532 | 2370 | 1715 | 809 | 924 |
|                                         | <i>pstA</i> | 794  | 905  | 1130 | 670  | 914  | 539  | 334 | 375 |
| Potassium cycling                       | <i>KefA</i> | 103  | 131  | 172  | 91   | 127  | 76   | 42  | 44  |
|                                         | <i>KefB</i> | 353  | 474  | 626  | 289  | 283  | 163  | 68  | 102 |
|                                         | <i>Kup</i>  | 1810 | 2187 | 2805 | 1545 | 2000 | 1359 | 715 | 693 |
|                                         | <i>KtrA</i> | 26   | 21   | 27   | 20   | 28   | 16   | 20  | 7   |
|                                         | <i>KtrB</i> | 44   | 73   | 58   | 46   | 48   | 19   | 10  | 12  |
| Pyoverdine siderophore                  | <i>pvdQ</i> | 25   | 13   | 21   | 17   | 21   | 18   | 2   | 9   |
|                                         | <i>pvdL</i> | 122  | 183  | 248  | 125  | 108  | 75   | 32  | 29  |
|                                         | <i>pvdD</i> | 190  | 224  | 296  | 143  | 154  | 87   | 37  | 52  |

|                         |             |      |      |      |      |      |      |     |     |
|-------------------------|-------------|------|------|------|------|------|------|-----|-----|
|                         | <i>pvdI</i> | 101  | 128  | 132  | 91   | 77   | 63   | 25  | 26  |
|                         | <i>PvdJ</i> | 122  | 183  | 171  | 118  | 64   | 61   | 28  | 35  |
|                         | <i>mbtH</i> | 14   | 16   | 17   | 16   | 17   | 10   | 4   | 4   |
| quorum sensing          | <i>ribB</i> | 672  | 786  | 947  | 553  | 805  | 503  | 237 | 299 |
| Tryptophan biosynthesis | <i>trpA</i> | 642  | 745  | 1063 | 606  | 1040 | 677  | 387 | 402 |
|                         | <i>trpB</i> | 1635 | 1780 | 1998 | 1340 | 2011 | 1429 | 689 | 798 |

**Table S3:** Data on of carbon-cycling genes found in maize rhizospheric samples

| Functional gene involved in  | Gene code   | GZ1  | GZ2  | GZ3  | GZ4  | AG1  | AG2  | AG3  | AG4  |
|------------------------------|-------------|------|------|------|------|------|------|------|------|
| Metabolism of carbohydrate   | <i>manC</i> | 126  | 111  | 104  | 75   | 234  | 179  | 77   | 102  |
|                              | <i>manA</i> | 307  | 363  | 495  | 300  | 539  | 344  | 212  | 235  |
|                              | <i>galK</i> | 560  | 614  | 825  | 419  | 899  | 572  | 279  | 361  |
|                              | <i>glcD</i> | 142  | 165  | 187  | 110  | 144  | 142  | 73   | 75   |
|                              | <i>melA</i> | 674  | 605  | 837  | 547  | 700  | 679  | 368  | 390  |
|                              | <i>lacZ</i> | 2449 | 2834 | 3412 | 2023 | 2989 | 2297 | 1115 | 1224 |
| Fixing of carbon             | <i>gap2</i> | 10   | 7    | 4    | 6    | 3    | 9    | 1    | 1    |
|                              | <i>codH</i> | 2721 | 3003 | 3206 | 2116 | 4230 | 2871 | 1342 | 1586 |
|                              | <i>cbbL</i> | 139  | 97   | 285  | 150  | 70   | 70   | 36   | 35   |
|                              | <i>cbbR</i> | 7    | 10   | 12   | 2    | 14   | 8    | 4    | 3    |
|                              | <i>cbbO</i> | 17   | 19   | 20   | 18   | 13   | 5    | 3    | 2    |
|                              | <i>cbbQ</i> | 51   | 101  | 116  | 54   | 26   | 28   | 5    | 12   |
|                              | <i>cbbX</i> | 41   | 47   | 63   | 43   | 155  | 102  | 39   | 49   |
|                              | <i>cbbS</i> | 31   | 40   | 34   | 30   | 64   | 34   | 16   | 13   |
|                              | <i>rpe</i>  | 736  | 997  | 1240 | 623  | 593  | 646  | 320  | 373  |
| Degradation of hemicellulose | <i>araB</i> | 15   | 34   | 30   | 9    | 20   | 17   | 10   | 7    |
|                              | <i>xylA</i> | 235  | 288  | 400  | 226  | 275  | 199  | 77   | 84   |
|                              | <i>xynA</i> | 277  | 284  | 402  | 231  | 296  | 168  | 103  | 129  |
| Degradation of methane       | <i>glpX</i> | 856  | 868  | 989  | 667  | 882  | 865  | 395  | 509  |
|                              | <i>fbaB</i> | 689  | 851  | 998  | 505  | 424  | 358  | 202  | 267  |
|                              | <i>mxoF</i> | 1286 | 1674 | 1820 | 997  | 974  | 563  | 256  | 351  |
|                              | <i>mmoX</i> | 137  | 252  | 530  | 188  | 81   | 49   | 66   | 57   |
|                              | <i>fbaA</i> | 552  | 654  | 846  | 759  | 603  | 254  | 285  | 353  |
| Degradation of Starch        | <i>glgB</i> | 231  | 251  | 310  | 183  | 268  | 148  | 82   | 77   |
|                              | <i>malQ</i> | 849  | 967  | 1245 | 806  | 1161 | 775  | 410  | 436  |
|                              | <i>bglX</i> | 2056 | 1975 | 2794 | 1804 | 3402 | 2246 | 1108 | 1313 |
|                              | <i>glgC</i> | 1072 | 1178 | 1377 | 820  | 1301 | 891  | 487  | 468  |
|                              | <i>abfA</i> | 571  | 515  | 833  | 451  | 624  | 579  | 321  | 378  |
|                              | <i>amyA</i> | 812  | 908  | 1082 | 684  | 734  | 640  | 343  | 348  |
|                              | <i>malZ</i> | 960  | 900  | 1072 | 791  | 964  | 956  | 494  | 509  |
|                              | <i>treA</i> | 157  | 198  | 243  | 125  | 179  | 93   | 56   | 69   |
|                              | <i>treC</i> | 70   | 49   | 68   | 41   | 88   | 43   | 22   | 27   |
| Degradation of xenobiotics   | <i>vanB</i> | 134  | 185  | 221  | 143  | 225  | 143  | 68   | 70   |
|                              | <i>uidA</i> | 57   | 56   | 81   | 53   | 97   | 40   | 24   | 29   |

**Table S4:** The forward selection of physicochemical parameters that explains the best difference in the functional genes composition among the samples

| Physicochemical parameter | Contribution % | Pseudo-F | <i>p</i> -value |
|---------------------------|----------------|----------|-----------------|
| N-NO <sub>3</sub>         | 31.3%          | 2.7      | 0.05            |
| N-NH <sub>4</sub>         | 20.4           | 2.1      | 0.07            |
| pH                        | 11.8           | 1.3      | 0.3             |
| OM                        | 12.2           | 1.5      | 0.25            |
| OC                        | 11.5           | 1.8      | 0.24            |
